# Supplementary material for: Highly efficient phenothiazine 5,5-dioxide-based hole transport materials for planar perovskite solar cells with a PCE exceeding 20%
Source: Royal Society of Chemistry journal article supplement (doi:10.1039/c9ta00654k), 2019-01-01
Supplement: c9ta00654k1.pdf [file c9ta00654k1.pdf]

## **Highly Efficient Phenothiazine 5, 5-Dioxide-Based Hole Transport Materials for Planar Perovskite Solar Cells with PCE Exceeding 20%**

Xingdong Ding,<sup>a</sup> Cheng Chen,<sup>a\*</sup> Linghao Sun,<sup>b</sup> Hongping Li,<sup>a</sup> Hong Chen,<sup>c</sup> Jie Su,<sup>d</sup>  
Huaming Li,<sup>a\*</sup> Henan Li,<sup>b</sup> Li Xu,<sup>a</sup> Ming Cheng,<sup>a\*</sup>

<sup>a</sup> Institute for Energy Research, Key Laboratory of Zhenjiang, Jiangsu University,  
Zhenjiang 212013, PR China

\* E-mail: [chencheng@ujs.edu.cn](mailto:chencheng@ujs.edu.cn), [lihm@ujs.edu.cn](mailto:lihm@ujs.edu.cn), [mingcheng@ujs.edu.cn](mailto:mingcheng@ujs.edu.cn).

<sup>b</sup> School of Chemistry and Chemical Engineering, Jiangsu University, Zhenjiang  
212013, P. R. China

<sup>c</sup> School of Environmental Science and Engineering, Southern University of Science  
and Technology, Shenzhen 518055, P. R. China

<sup>d</sup> College of Chemistry and Molecular Engineering, Peking University, Beijing 100871,  
P. R. China

## Synthesis method

**Chemicals:** All of the solvents and chemicals were used as received unless specially stated.

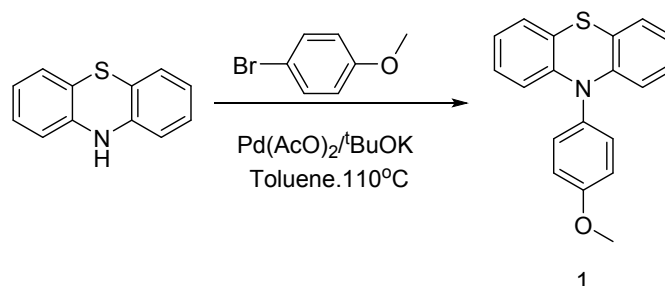

**10-(4-Methoxyphenyl)-10H-phenothiazine (1).** A mixture of 4-bromoanisole (0.823 g, 4.40 mmol), phenothiazine (0.797 g, 4.00 mmol), catalyst palladium diacetate (0.018 g, 0.08 mmol), tri-tert-butylphosphonate (0.05 mmol) and potassium *tert*-butoxide (0.577 g, 6.00 mmol) in toluene (50 mL) was stirred at 110 °C for 24 h. After cooling down the reaction to room temperature, 50 mL dichloromethane was added into reaction solution, and then wash three times with 150mL water. The organic layer was collected and evaporated under reduced pressure. The crude product was purified by column chromatography (petroleum ether/dichloromethane = 4:1 vol/vol) to obtain **1** (0.991 g, yield: 81.16%) as an off-white solid. <sup>1</sup>H-NMR (CDCl<sub>3</sub>): δ 7.34 (d, J = 8.7 Hz, 2H); 7.14 (d, J = 8.7 Hz, 2H); 7.02 (dd, J = 7.5, 1.6 Hz, 2H); 6.88-6.85 (m, 2H); 6.83-6.80 (m, 2H); 6.22 (dd, J = 8.2, 1.2 Hz, 2H); 3.93 (s, 3H) ppm. HR-MS: calculated: C<sub>19</sub>H<sub>15</sub>NOS, 305.0874, found:305.0870.

Table S1 Synthesis cost of intermediate **1**

| Reagent             | Amount /g | Amount /ml | Price (RMB/g or RMB/mL) | Total price (RMB) |
|---------------------|-----------|------------|-------------------------|-------------------|
| Phenothiazine       | 0.797     |            | 0.316                   | 0.251             |
| 4-bromoanisole      | 0.823     |            | 0.590                   | 0.486             |
| Palladium diacetate | 0.018     |            | 180.000                 | 3.240             |

|                                |               |        |       |        |
|--------------------------------|---------------|--------|-------|--------|
| Tri-tert-butylphosphonate      |               | 0.116  | 7.450 | 0.865  |
| Potassium tert-butoxide        | 0.577         |        | 0.396 | 0.228  |
| Toluene                        |               | 50.00  | 0.041 | 2.050  |
| Silica gel                     | 100.00        |        | 0.292 | 29.230 |
| Petroleum ether                |               | 400.00 | 0.119 | 47.400 |
| Dichloromethane                |               | 150.00 | 0.182 | 27.250 |
| <b>Total cost</b>              | 111.000 RMB   |        |       |        |
| <b>Amount intermediate 1</b>   | 0.990 g       |        |       |        |
| <b>COST for intermediate 1</b> | 112.121 RMB/g |        |       |        |
| <b>Exchange rate</b>           | 1\$=6.930 RMB |        |       |        |

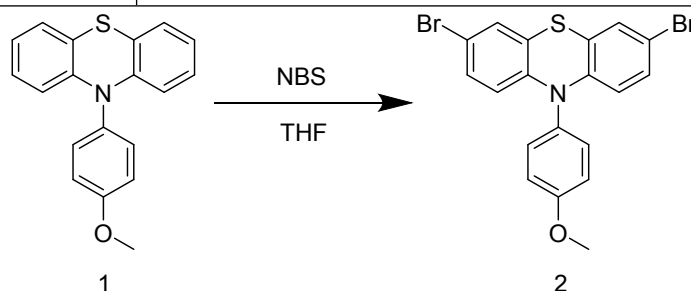

**3,7-dibromo-10-(4-methoxyphenyl)-10H-phenothiazine (2).** *N*-Bromo-succinimide (1.957 g, 11.00 mmol) was added in small portions to a solution of **1** (1.540 g, 5.00 mmol) in THF (100 mL) and the obtained mixture was stirred for 6h at 0-5 °C. The reaction mixture was then poured into water and the obtained solid was filtered, washed with water and dried under vacuum. The collected crude product was purified by elution through a short silica plug (petroleum ether/dichloromethane = 2:1 vol/vol) to afford **2** (1.76 g, yield: 76.3%) as a yellow solid. <sup>1</sup>H NMR (400 MHz, Acetone) δ 7.47 – 7.29 (m, 2H), 7.27 – 7.13 (m, 4H), 7.06 (dd, J = 8.8, 2.2 Hz, 2H), 6.11 (d, J = 8.8 Hz, 2H), 3.92 (s, 3H) ppm. HR-MS: calculated: C<sub>19</sub>H<sub>13</sub>Br<sub>2</sub>NOS, 460.9085, found: 462.9077.

Table S2 Synthesis cost of intermediate 2

| Reagent | Amount | Amount | Price (RMB/g) | Total price |
|---------|--------|--------|---------------|-------------|
|---------|--------|--------|---------------|-------------|

|                                | /g            | /ml    | or RMB/mL) | (RMB)   |
|--------------------------------|---------------|--------|------------|---------|
| 1                              | 1.540g        |        | 112.121    | 172.666 |
| THF                            |               | 100.00 | 0.063      | 6.250   |
| NBS                            | 1.967         |        | 0.395      | 0.779   |
| Silica gel                     | 100.00        |        | 0.292      | 29.200  |
| Petroleum ether                |               | 300.00 | 0.119      | 35.550  |
| Dichloromethane                |               | 200.00 | 0.182      | 36.340  |
| <b>Total cost</b>              | 280.611 RMB   |        |            |         |
| <b>Amount intermediate 2</b>   | 1.760 g       |        |            |         |
| <b>COST for intermediate 2</b> | 159.430 RMB/g |        |            |         |
| <b>Exchange rate</b>           | 1\$=6.930 RMB |        |            |         |

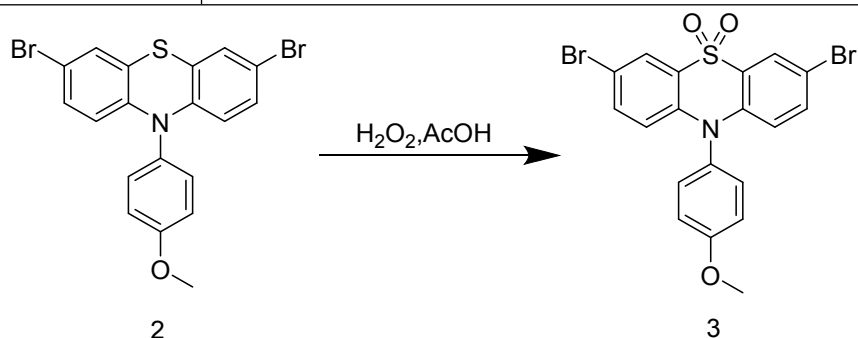

**3,7-dibromo-10-(4-methoxyphenyl)-10H-phenothiazine 5,5-dioxide (3).** Hydrogen peroxide (25 mL) was slow added in small portions to a solution of **2** (1.760 g, 3.800 mmol) in acetic acid (50 mL) and the obtained mixture was stirred for 6h at 120-130 °C. After cooling down the reaction to room temperature, the mixture was washed with water several times. The organic layer was collected and evaporated under reduced pressure. The collected crude product was purified by elution through a short silica plug (petroleum ether/dichloromethane = 2:1 vol/vol) to afford **3** (1.130 g, yield: 60.1%) as a yellow solid. <sup>1</sup>H-NMR (400 MHz, CDCl<sub>3</sub>) δ 8.23 (d, J = 2.3 Hz, 2H), 7.46 (dd, J = 9.2, 2.3 Hz, 2H), 7.24 (dt, J = 5.3, 3.1 Hz, 2H), 7.19 – 7.14 (m, 2H), 6.57 (d, J = 9.2 Hz, 2H), 3.94 (s, 3H) ppm. HR-MS: calculated: C<sub>19</sub>H<sub>13</sub>Br<sub>2</sub>NO<sub>3</sub>S, 492.8983, found:

494.8963.

Table S3 Synthesis cost of intermediate 3

| Reagent                        | Amount /g     | Amount /ml | Price (RMB/g Or RMB/mL) | Total price (RMB) |
|--------------------------------|---------------|------------|-------------------------|-------------------|
| 2                              | 1.760         |            | 159.430                 | 280.611           |
| H <sub>2</sub> O <sub>2</sub>  |               | 25.00      | 0.030                   | 0.750             |
| AcOH                           |               | 50.00      | 0.069                   | 3.425             |
| Silica gel                     | 100.00        |            | 0.292                   | 29.200            |
| Petroleum ether                |               | 200.00     | 0.119                   | 23.700            |
| Dichloromethane                |               | 250.00     | 0.182                   | 45.425            |
| <b>Total cost</b>              | 383.111 RMB   |            |                         |                   |
| <b>Amount intermediate 3</b>   | 1.130 g       |            |                         |                   |
| <b>COST for intermediate 3</b> | 339.030 RMB/g |            |                         |                   |
| <b>Exchange rate</b>           | 1\$=6.930 RMB |            |                         |                   |

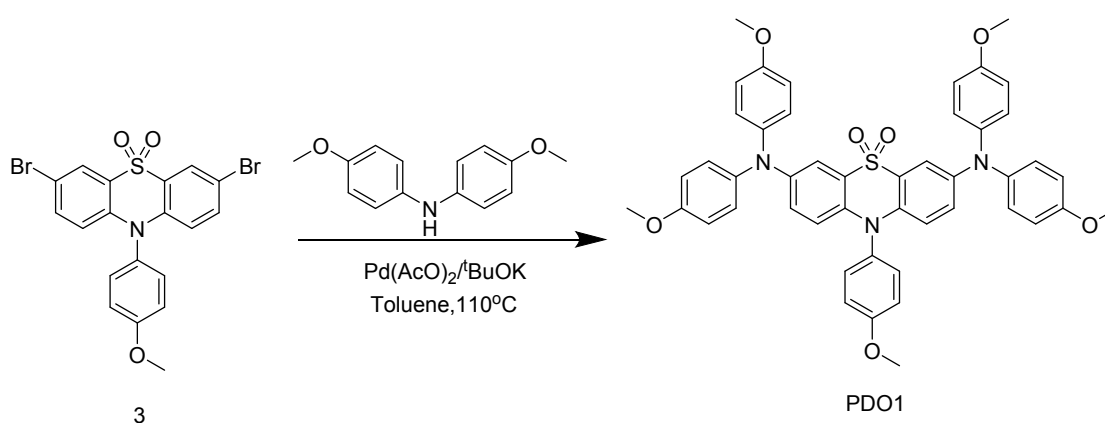

**3,7-bis(bis(4-methoxyphenyl)amino)-10-(4-methoxyphenyl)-10H-phenothiazine**

**5,5-dioxide (PDO1).** A mixture of **3** (0.493 g, 1.00 mmol), 4,4-Dimethoxydiphenylamine (0.560 g, 2.20 mmol), palladium acetate (0.012 g, 0.05 mmol), tri-tert-butylphosphonate (0.10 mmol) and potassium tertiary butanol (0.339 g, 3.00 mmol) in toluene (100 mL) was stirred at 110 °C for 24 h. After cooling down the reaction to room temperature, the mixture was diluted with dichloromethane and washed with water. The organic layer was collected and evaporated under reduced pressure. The crude product was purified by column chromatography (petroleum ether/ethyl acetate = 2:1 vol/vol) to obtain PDO1 (0.560 g, yield: 70.8%) as a yellow solid. <sup>1</sup>H-NMR (400 MHz, Acetone) δ 7.41 (d, J = 2.7 Hz, 2H), 7.37 (d, J = 8.9 Hz, 2H), 7.25 (d, J = 8.9 Hz, 2H), 7.10 – 7.00 (m, 10H), 6.96 – 6.86 (m, 8H), 6.59 (d, J = 9.3 Hz, 2H), 3.91 (s, 3H), 3.78 (d, J = 5.0 Hz, 12H) ppm. <sup>13</sup>C-NMR (101 MHz, Acetone): 205.41, 205.22, 205.01, 163.27, 159.78, 156.41, 144.16, 143.48, 142.33, 140.41, 140.26, 135.26, 134.57, 131.61, 131.52, 128.20, 126.25, 125.93, 122.69, 121.32, 118.37, 116.20, 114.91, 112.57, 55.14, 54.82, 29.51, 29.32, 29.12, 28.93, 28.74, 28.55, 28.35 ppm. HR-MS: calculated: C<sub>47</sub>H<sub>41</sub>N<sub>3</sub>O<sub>7</sub>S, 791.2665, found: 791.2654.

Table S4 Synthesis cost of **PDO1**

| Reagent                    | Amount<br>/g | Amount<br>/mL | Price(RMB/g<br>orRMB/mL) | Total<br>price(RMB) |
|----------------------------|--------------|---------------|--------------------------|---------------------|
| 3                          | 0.493        |               | 339.030                  | 167.142             |
| 4,4-Dimethoxydiphenylamine | 0.560        |               | 38.400                   | 21.504              |
| Palladium diacetate        | 0.012        |               | 180.000                  | 2.160               |
| Tri-tert-butylphosphonate  |              | 0.232         | 7.450                    | 1.728               |
| Potassium Tert-butoxide    | 0.339        |               | 0.396                    | 0.134               |
| Toluene                    |              | 100.00        | 0.041                    | 4.100               |
| Silica gel                 | 50.00        |               | 0.292                    | 14.600              |

|                      |               |        |       |        |
|----------------------|---------------|--------|-------|--------|
| Petroleum ether      |               | 200.00 | 0.119 | 23.700 |
| Ethyl acetate        |               | 100.00 | 0.063 | 6.250  |
| <b>Total cost</b>    | 241.318 RMB   |        |       |        |
| <b>Amount PDO1</b>   | 0.560 g       |        |       |        |
| <b>COST for PDO1</b> | 430.920 RMB/g |        |       |        |
| <b>Exchange rate</b> | 1\$=6.930 RMB |        |       |        |

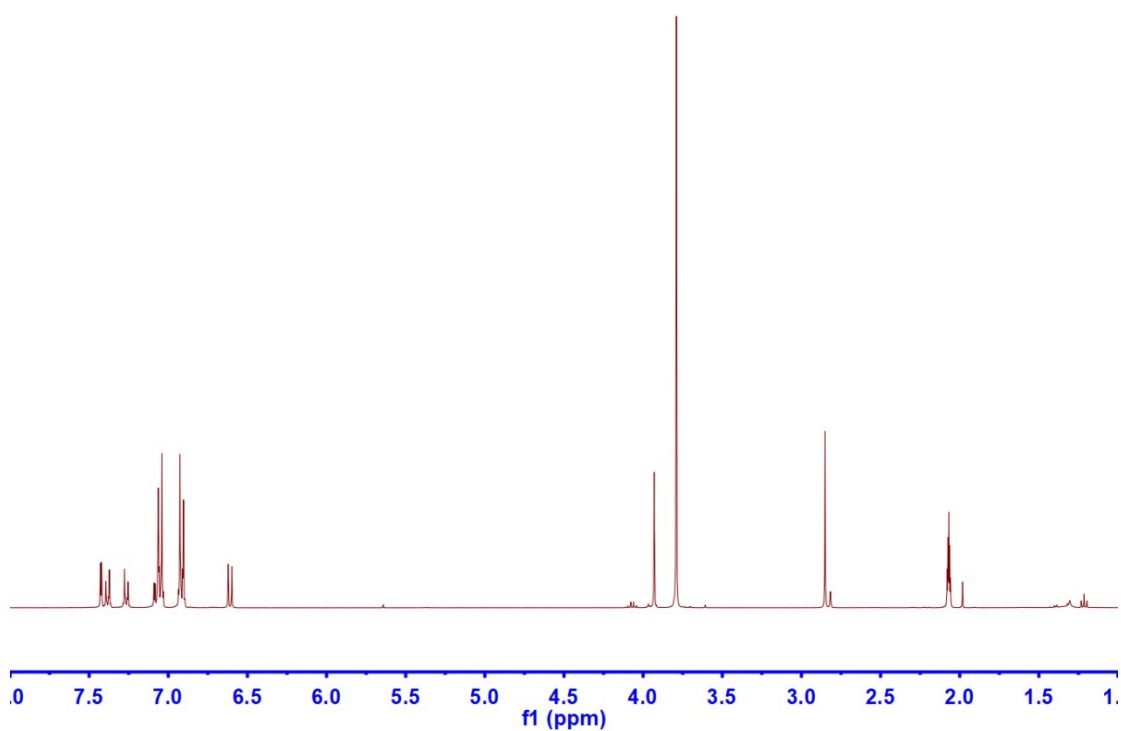

Figure S1. <sup>1</sup>H-NMR spectrum of PDO1 recorded in acetone

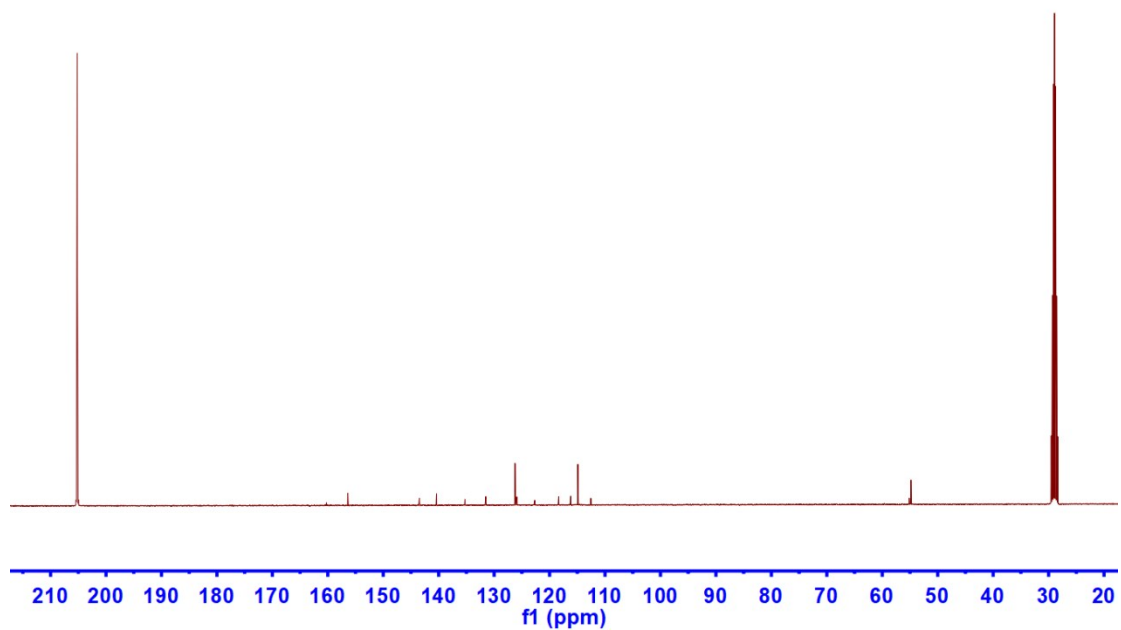

Figure S2.  $^{13}\text{C}$ -NMR spectrum of PDO1 recorded in acetone

zhangl

GCT CA156

31-May-2018 16:01:59

yx180531-4 576 (9.585) Cm (576:577-105:129)

TOF MS EI+  
662

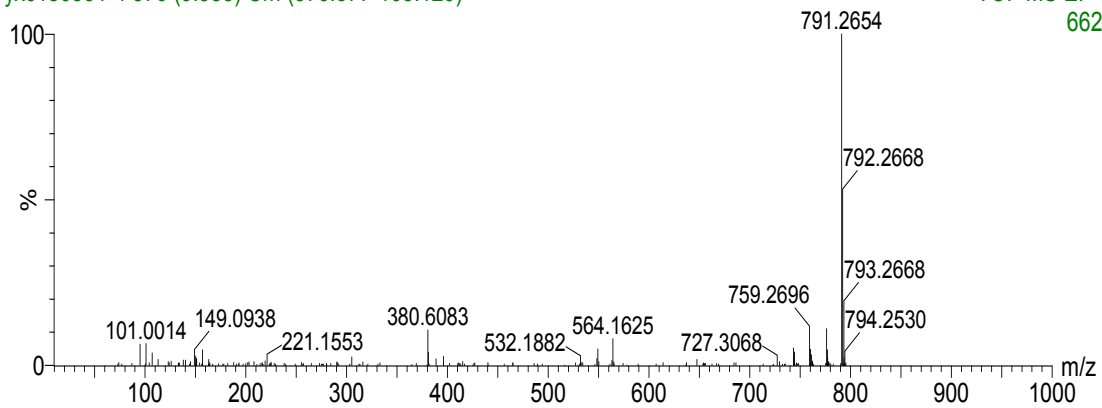

Figure S3 HR-MS of PDO1

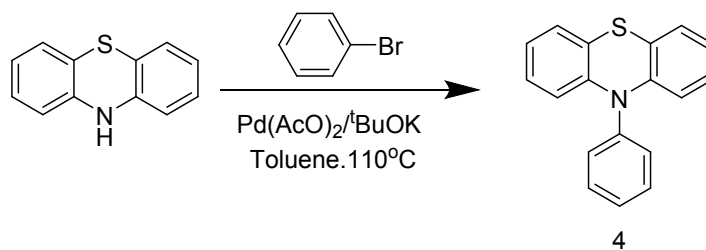



**10-phenyl-10H-phenothiazine (4).** A mixture of phenothiazine (5g, 25.00mmol) bromobenzene (4.137 g, 26.25 mmol), catalyst palladium acetate (0.300 g, 1.25 mmol), tri-tert-butylphosphine (5.000 g, 2.50 mmol) and tert-butyl Potassium alkoxide (8.475 g, 75.00 mmol) in toluene (100 mL) was stirred at 110 °C for 24 h. After cooling down the reaction to room temperature, the mixture was diluted with dichloromethane and washed with water. The organic layer was collected and evaporated under reduced pressure. The crude product was purified by column chromatography (petroleum ether/dichloromethane = 10:1 vol/vol) to obtain **4** (5.300 g, yield: 77.0%) as an off-white solid. <sup>1</sup>H-NMR (400 MHz, CDCl<sub>3</sub>) δ 7.62 (d, J = 16.8 Hz, 2H), 7.47 (t, J = 7.4 Hz, 1H), 7.39 (d, J = 7.1 Hz, 2H), 7.01 (t, J = 8.4 Hz, 3H), 6.95 – 6.73 (m, 3H), 6.30 – 6.10 (m, 2H) ppm. HR-MS: calculated: C<sub>18</sub>H<sub>13</sub>NS, 275.0769, found: 275.0781.

Table S5 Synthesis cost of intermediate **4**

| Reagent                   | Amount /g | Amount /ml | Price(RMB/g orRMB/mL) | Total price(RMB) |
|---------------------------|-----------|------------|-----------------------|------------------|
| Phenothiazine             | 5.000     |            | 0.316                 | 1.580            |
| Bromobenzene              | 4.137     |            | 0.216                 | 0.932            |
| Palladium diacetate       | 0.300     |            | 180.000               | 54.00            |
| Tri-tert-butylphosphonate |           | 5.80       | 7.450                 | 43.210           |
| Potassium Tert-butoxide   | 8.475     |            | 0.396                 | 3.356            |
| Toluene                   |           | 100.00     | 0.041                 | 4.100            |
| Silica gel                | 200.00    |            | 0.292                 | 58.400           |
| Petroleum ether           |           | 1000.00    | 0.119                 | 118.500          |
| Dichloromethane           |           | 100.00     | 0.182                 | 18.170           |

|                                |               |       |       |       |
|--------------------------------|---------------|-------|-------|-------|
| Ethyl acetate                  |               | 50.00 | 0.063 | 3.125 |
| Total cost                     | 305.373 RMB   |       |       |       |
| <b>Amount intermediate 4</b>   | 5.300 g       |       |       |       |
| <b>COST for intermediate 4</b> | 57.618 RMB/g  |       |       |       |
| <b>Exchange rate</b>           | 1\$=6.930 RMB |       |       |       |

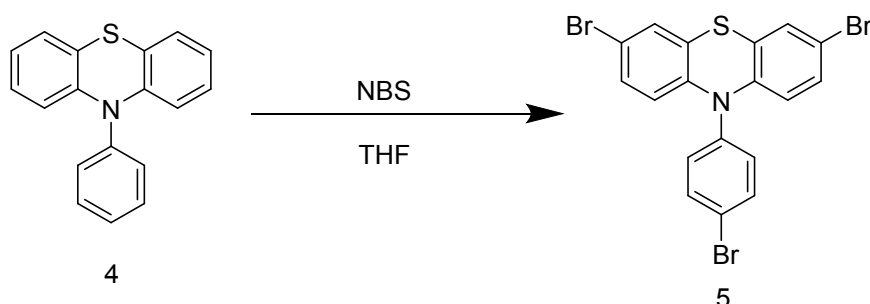

**3,7-dibromo-10-(4-bromophenyl)-10H-phenothiazine (5).** *N*-Bromo-succinimide (11.000 g, 61.70 mmol) was added in small portions to a solution of **4** (5.300 g, 19.30 mmol) in THF (100 mL) and the obtained mixture was stirred for 6h at 0-5 °C. The reaction mixture was then poured into water and the obtained solid was filtered, washed with water and dried under vacuum. The collected crude product was purified by elution through a short silica plug (petroleum ether/dichloromethane = 2:1 vol/vol) to obtain **5** (4.500 g, yield: 45.6%) as a white solid. <sup>1</sup>H-NMR (400 MHz, CDCl<sub>3</sub>) δ 7.80 – 7.66 (m, 2H), 7.26 – 7.16 (m, 2H), 7.11 (d, J = 2.3 Hz, 2H), 6.94 (dd, J = 8.8, 2.3 Hz, 2H), 6.02 (d, J = 8.8 Hz, 2H). HR-MS: calculated: C<sub>18</sub>H<sub>10</sub>Br<sub>3</sub>NS, 508.8084, found: 510.8071.

Table S6 Synthesis cost of intermediate **5**

| Reagent | Amount /g | Amount /ml | Price(RMB/g or RMB/mL) | Total price(RMB) |
|---------|-----------|------------|------------------------|------------------|
| 4       | 5.300     |            | 57.618                 | 305.373          |
| THF     |           | 100.00     | 0.063                  | 6.250            |
| NBS     | 11.000    |            | 0.395                  | 4.345            |

|                                |               |        |       |        |
|--------------------------------|---------------|--------|-------|--------|
| Silica gel                     | 150.000       |        | 0.292 | 43.800 |
| Petroleum ether                |               | 400.00 | 0.119 | 47.400 |
| Dichloromethane                |               | 200.00 | 0.188 | 36.340 |
| <b>Total cost</b>              | 443.508 RMB   |        |       |        |
| <b>Amount intermediate 5</b>   | 4.500 g       |        |       |        |
| <b>COST for intermediate 5</b> | 98.557 RMB/g  |        |       |        |
| <b>Exchange rate</b>           | 1\$=6.930 RMB |        |       |        |

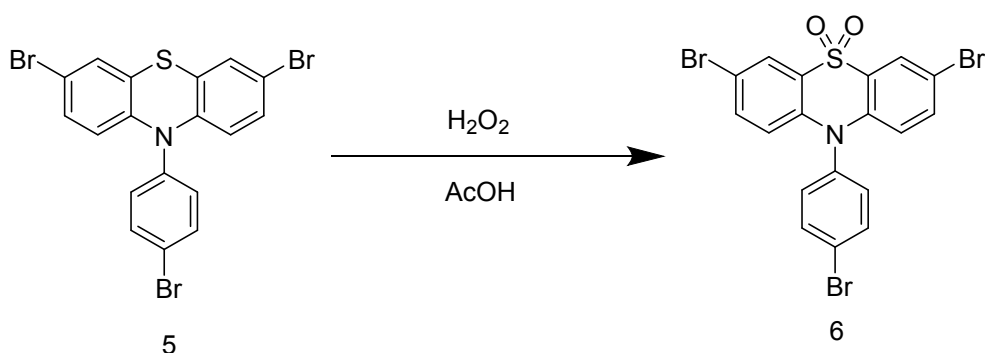

**3,7-dibromo-10-(4-bromophenyl)-10H-phenothiazine 5,5-dioxide (6).** hydrogen peroxide (25 mL) was slow added in small portions to a solution of **5** (2.27 g, 4.44 mmol) in acetic acid (50 mL) and the obtained mixture was stirred for 6h at 120-130°C, After cooling down the reaction to room temperature, the mixture was washed with water several times, The organic layer was collected and evaporated reduced pressure. The collected crude product was purified by elution through a short silica plug (petroleum ether/dichloromethane = 1:1 vol/vol) to obtain **6** (2.8 g, yield: 96.5%) as a yellow solid. <sup>1</sup>H-NMR (400 MHz, CDCl<sub>3</sub>) δ 8.25 (d, J = 2.3 Hz, 2H), 7.89 – 7.83 (m, 2H), 7.49 (dd, J = 9.1, 2.3 Hz, 2H), 7.30 – 7.23 (m, 2H), 6.52 (d, J = 9.1 Hz, 2H). HR-MS: calculated: C<sub>18</sub>H<sub>10</sub>Br<sub>3</sub>NS, 540.7982, found: 544.7947.

Table S7 Synthesis cost of intermediate 6

| Reagent | Amount /g | Amount /ml | Price(RMB/g or RMB/mL) | Total price(RMB) |
|---------|-----------|------------|------------------------|------------------|
|---------|-----------|------------|------------------------|------------------|

|                                |               |        |        |         |
|--------------------------------|---------------|--------|--------|---------|
| 5                              | 2.270         |        | 98.557 | 223.725 |
| H <sub>2</sub> O <sub>2</sub>  |               | 25.00  | 0.030  | 0.750   |
| AcOH                           |               | 100.00 | 0.069  | 6.850   |
| Silica gel                     | 100.00        |        | 0.292  | 29.200  |
| Petroleum ether                |               | 350.00 | 0.119  | 41.475  |
| Dichloromethane                |               | 350.00 | 0.182  | 63.595  |
| <b>Total cost</b>              | 365.595 RMB   |        |        |         |
| <b>Amount intermediate 6</b>   | 2.800 g       |        |        |         |
| <b>COST for intermediate 6</b> | 130.569 RMB/g |        |        |         |
| <b>Exchange rate</b>           | 1\$=6.930 RMB |        |        |         |

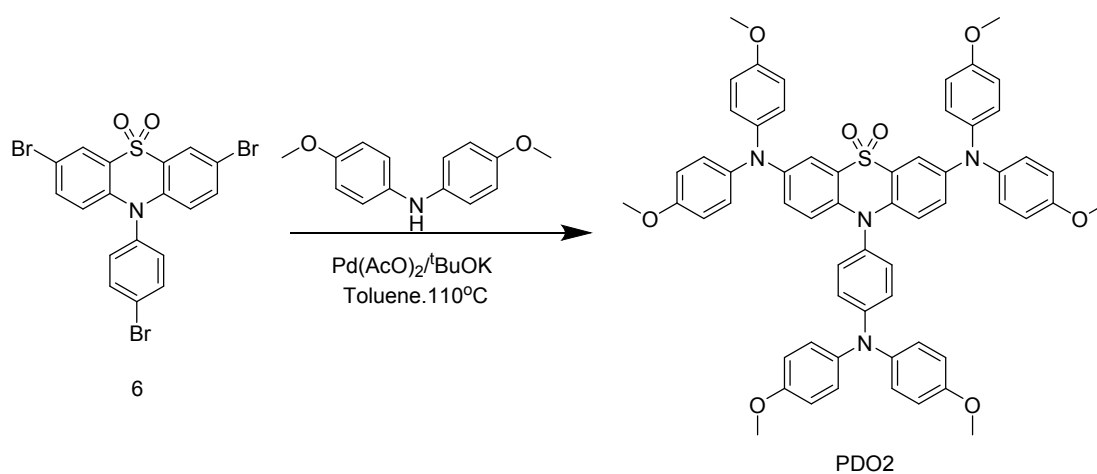

**3,7-bis(bis(4-methoxyphenyl)amino)-10-(4-(bis(4-methoxyphenyl)amino)phenyl)-10H-phthalazine 5,5-dioxide (PDO2).** A mixture of **6** (1.210 g, 2.20 mmol), 4,4-Dimethoxydiphenylamine (1.690 g, 7.40 mmol), palladium acetate (0.026 g, 0.11 mmol), tertiary butyl phosphine (0.445 g, 0.22 mmol) and potassium tertiary butanol (0.746 g, 6.60 mmol) in toluene (100 mL) was stirred at 110°C for 24 h. After cooling down the reaction to room temperature, the mixture was diluted with dichloromethane and washed with water. The organic layer was collected and evaporated reduced

pressure. The crude product was purified by column chromatography (petroleum ether/ethyl acetate = 2:1 vol/vol) to obtain PDO2 (0.94 g, yield: 43.2%) as a yellow solid. <sup>1</sup>H-NMR (400 MHz, CDCl<sub>3</sub>) δ 7.26 (s, 2H), 7.19 – 7.10 (m, 5H), 7.04 (dd, J = 17.4, 8.6 Hz, 12H), 6.92 – 6.85 (m, 5H), 6.81 (s, 8H), 6.59 (s, 2H), 3.89 – 3.66 (m, 18H) ppm. <sup>13</sup>C-NMR (101 MHz, CDCl<sub>3</sub>): 156.69, 156.59, 154.01, 149.52, 148.30, 139.99, 137.84, 133.10, 128.87, 127.41, 126.99, 126.63, 126.00, 124.61, 122.05, 121.50, 120.35, 119.26, 118.21, 116.68, 115.02, 106.07, 77.37, 77.25, 77.05, 76.73, 73.25, 55.52, 55.50, 31.92, 31.45, 30.23, 29.69, 29.35, 22.68, 14.21, 14.11 ppm. HR-MS: calculated: C<sub>60</sub>H<sub>52</sub>N<sub>4</sub>O<sub>8</sub>S, 988.3506, found [M+H]:989.3552.

Table S8 Synthesis cost of PDO2

| Reagent                    | Amount /g     | Amount /ml | Price(RMB/g or RMB/mL) | Total price(RMB) |
|----------------------------|---------------|------------|------------------------|------------------|
| 6                          | 1.210         |            | 130.569                | 157.989          |
| 4,4-Dimethoxydiphenylamine | 1.690         |            | 38.400                 | 64.896           |
| Palladium diacetate        | 0.026         |            | 180.000                | 4.752            |
| Tri-tert-butylphosphonate  |               | 5.10       | 7.450                  | 38.025           |
| Potassium tert-butoxide    | 0.746         |            | 0.396                  | 0.295            |
| Toluene                    |               | 100.00     | 0.041                  | 41.000           |
| Silica gel                 | 100.00        |            | 0.292                  | 29.200           |
| Petroleum ether            |               | 400.00     | 0.119                  | 47.400           |
| Ethyl acetate              |               | 250.00     | 0.063                  | 15.625           |
| <b>Total cost</b>          | 399.182 RMB   |            |                        |                  |
| <b>Amount PDO2</b>         | 0.940 g       |            |                        |                  |
| <b>COST for PDO2</b>       | 424.662 RMB/g |            |                        |                  |
| <b>Exchange rate</b>       | 1\$=6.930 RMB |            |                        |                  |

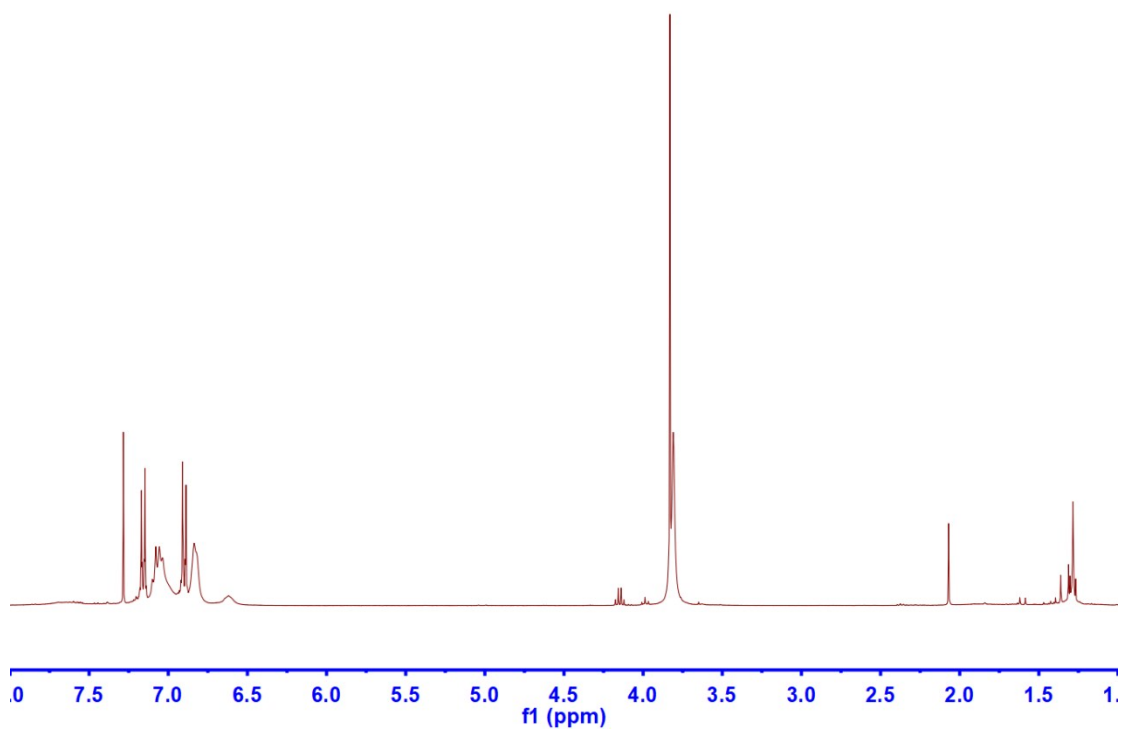

Figure S4.  $^1\text{H}$ -NMR spectrum of PDO2 recorded in  $\text{CDCl}_3$

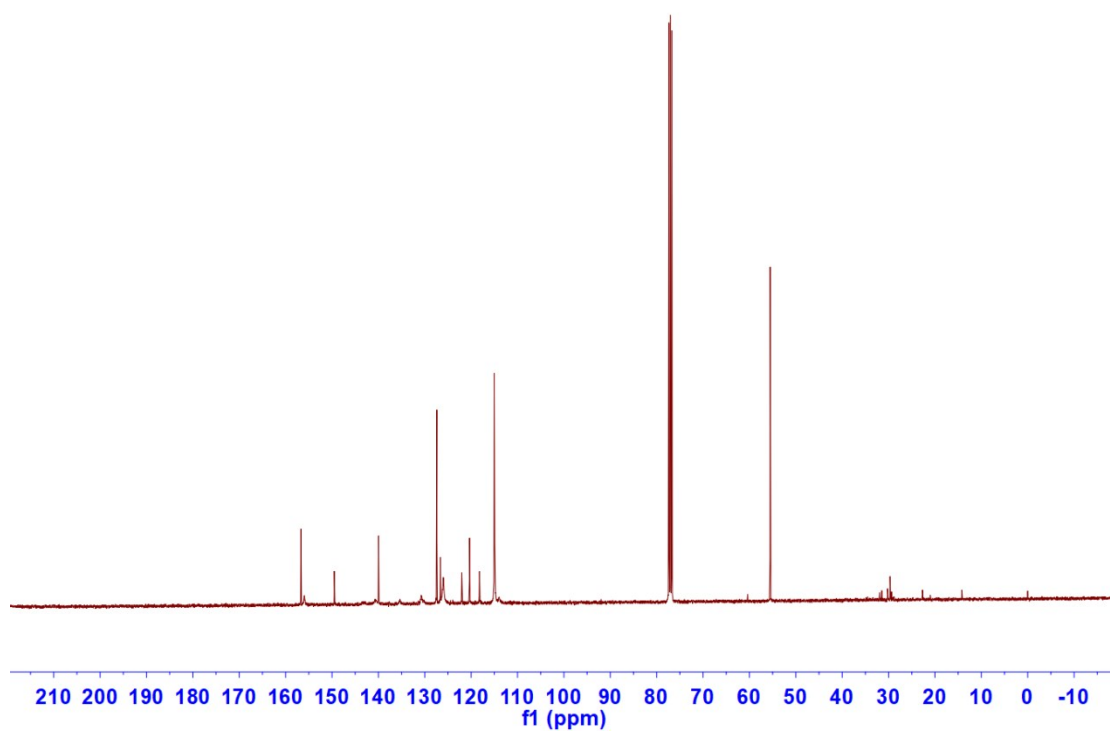

Figure S5.  $^{13}\text{C}$ -NMR spectrum of PDO2 recorded in  $\text{CDCl}_3$

20180716-SXK-M988 #7-9 RT: 0.06-0.08 AV: 3 NL: 1.17E7  
T: FTMS + p ESI Full ms [200.00-1200.00]

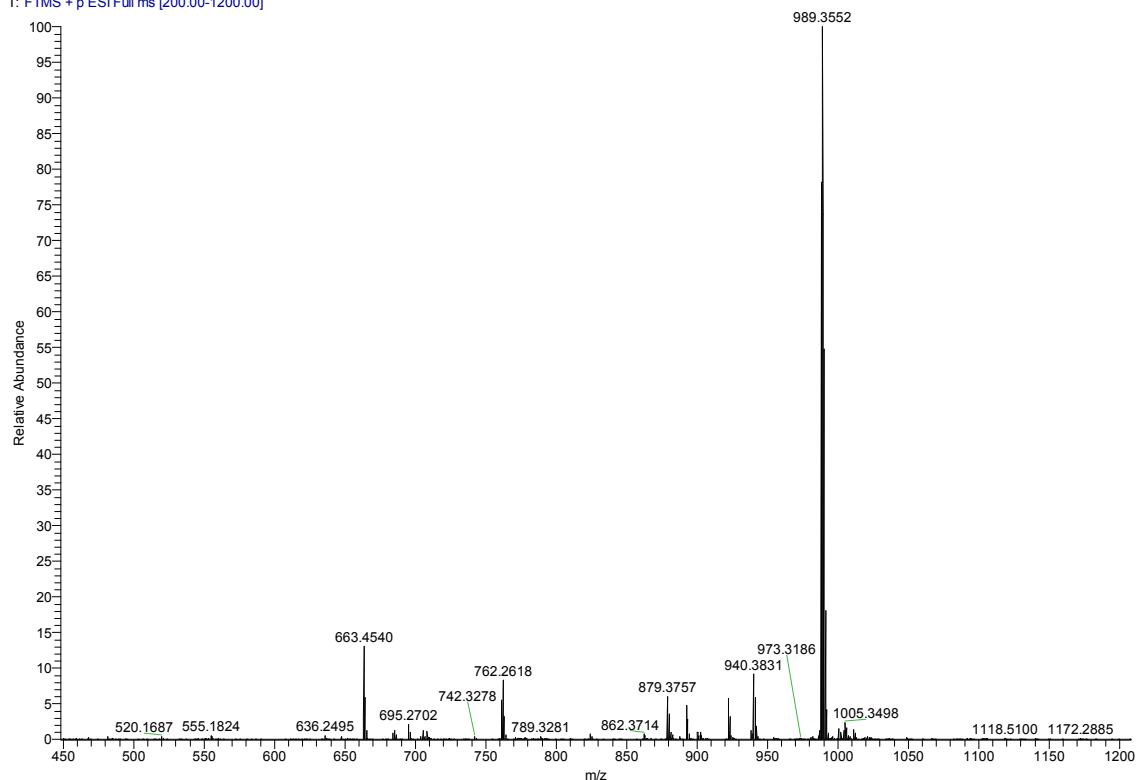

Figure S6 HR-MS of PDO2

### Computational Details

In the simulation for this publication optimization and single point energy calculations are performed using the B3LYP and the 6-31G\* basis set for all atoms, without any symmetry constraints. All reported calculations were carried out by means of Gaussian 09.

### Measurement

The absorption spectra were recorded on an Agilent 8453 spectrophotometer using a 1 cm cuvette. Cyclic voltammetry (CV) was performed in dichloromethane with 0.1 M TBAPF<sub>6</sub> as the supporting electrolyte, a Ag<sup>+</sup>/AgNO<sub>3</sub> electrode as the reference electrode, a carbon-glass electrode as the working electrode, a Pt electrode as the counter electrode and ferrocene/ferrocenium (*Fc/Fc*<sup>+</sup>) as an internal reference with a Zahner electrochemical workstation. The SEM images were taken on a JEOL JSM-7800. Light source for the photocurrent-voltage (*J-V*) measurement is an AM 1.5G solar simulator. The incident light intensity was 100 mW·cm<sup>-2</sup> calibrated with a standard Si solar cell. The tested solar cells were masked to a working area of 0.126

cm<sup>2</sup>. The photocurrent-voltage ( $J$ - $V$ ) curves were obtained by the linear sweep voltammetry (LSV) method using a Keithley 2400 source-measure unit. The measurement of the incident-photon-to-current conversion efficiency (IPCE) was performed with CEL-QPCE3000 photoelectric chemical quantum efficiency testing and analysis system. For the steady-state PL decay, the excitation wavelength is 438 nm. NMR spectra were recorded on a Bruker AVANCE 400 MHz spectrometer. Hole mobility was measured by using the space-charge-limited current (SCLC) method with the device structure of FTO/PEDOT:PSS/HTM/Au. Two devices (eight groups of data) are tested and the data shown in Figure is an average data. Space-charge-limited current can be described by equation below:

$$J = \frac{9}{8} \mu \epsilon_0 \epsilon_r \frac{V^2}{D^3}$$

where  $J$  is the current density,  $\mu$  is the hole mobility,  $\epsilon_0$  is the vacuum permittivity ( $8.85 \times 10^{-12}$  F/m),  $\epsilon_r$  is the dielectric constant of the material (normally taken to approach 3 for organic semiconductors),  $V$  is the applied bias, and  $D$  is the film thickness.

For conductivity, two devices (six groups of data) are tested and the data shown in Figure is also an average data. The electrical conductivities of the HTM films were determined by using two-probe electrical conductivity measurements. The electrical conductivity ( $\sigma$ ) was calculated by using the following equation:

$$\sigma = \frac{W}{R L D}$$

where  $L$  is the channel length 10 mm,  $W$  is the channel width 2 mm,  $D$  is the film thickness of the TiO<sub>2</sub> and HTM, and  $R$  is the film resistance calculated from the gradients of the curves.



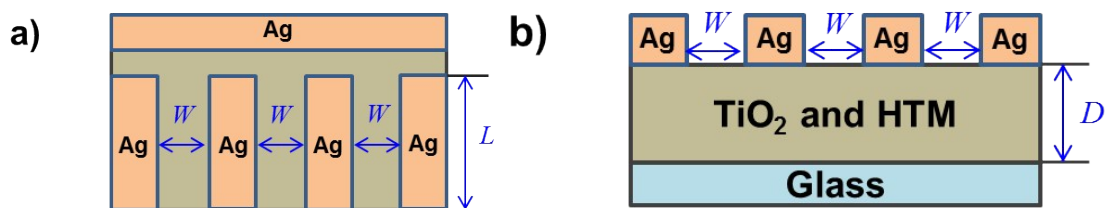

Scheme S1 Schematic illustrations of the conductivity device: (a) top-sectional view;  
(b) cross-sectional view

Single crystal X-ray diffraction data of PDO1 and PDO2 were collected on a Rigaku XtaLAB PRO 007HF(Mo) diffractometer with Mo  $K\alpha$  radiation ( $\lambda = 0.71073 \text{ \AA}$ ), at 180 K and 290 K respectively. Data reduction and empirical absorption correction were performed using the CrysAlisPro program. The structure was solved by a dual-space algorithm using SHELXT program. All non-hydrogen atoms could be located directly from the difference Fourier maps. Framework hydrogen atoms were placed geometrically and constrained using the riding model to the parent atoms. Final structure refinement was done using the SHELXL program by minimizing the sum of squared deviations of  $F^2$  using a full-matrix technique.

Table S9 Crystal data and structure refinement for PDO1

|                                    |                            |
|------------------------------------|----------------------------|
| Identification code                | a_a                        |
| Empirical formula                  | $C_{20}H_{20}N_2O_{10}S_2$ |
| Formula weight                     | 512.50                     |
| Temperature/K                      | 293(2)                     |
| Crystal system                     | monoclinic                 |
| Space group                        | C2/c                       |
| a/ $\text{\AA}$                    | 40.4587(8)                 |
| b/ $\text{\AA}$                    | 11.7583(2)                 |
| c/ $\text{\AA}$                    | 17.7354(3)                 |
| $\alpha/^\circ$                    | 90                         |
| $\beta/^\circ$                     | 105.271(2)                 |
| $\gamma/^\circ$                    | 90                         |
| Volume/ $\text{\AA}^3$             | 8139.3(3)                  |
| Z                                  | 16                         |
| $\rho_{\text{calc}}/\text{g/cm}^3$ | 1.673                      |
| $\mu/\text{mm}^{-1}$               | 0.328                      |
| F(000)                             | 4256.0                     |
| Crystal size/ $\text{mm}^3$        | ? $\times$ ? $\times$ ?    |

|                                                  |                                                                    |
|--------------------------------------------------|--------------------------------------------------------------------|
| Radiation                                        | MoK $\alpha$ ( $\lambda = 0.71073$ )                               |
| 2 $\Theta$ range for data collection/ $^{\circ}$ | 4.174 to 50.052                                                    |
| Index ranges                                     | $-43 \leq h \leq 48$ , $-13 \leq k \leq 13$ , $-21 \leq l \leq 21$ |
| Reflections collected                            | 24108                                                              |
| Independent reflections                          | 7171 [ $R_{\text{int}} = 0.0231$ , $R_{\text{sigma}} = 0.0249$ ]   |
| Data/restraints/parameters                       | 7171/0/528                                                         |
| Goodness-of-fit on $F^2$                         | 1.048                                                              |
| Final R indexes [ $I \geq 2\sigma(I)$ ]          | $R_1 = 0.0486$ , $wR_2 = 0.1477$                                   |
| Final R indexes [all data]                       | $R_1 = 0.0581$ , $wR_2 = 0.1557$                                   |
| Largest diff. peak/hole / e $\text{\AA}^{-3}$    | 1.53/-0.54                                                         |

Table S10 Crystal data and structure refinement for PDO2

|                                                  |                                                                    |
|--------------------------------------------------|--------------------------------------------------------------------|
| Identification code                              | i2a_a                                                              |
| Empirical formula                                | $\text{C}_{60}\text{H}_{52}\text{N}_4\text{O}_8\text{S}$           |
| Formula weight                                   | 989.12                                                             |
| Temperature/K                                    | 298                                                                |
| Crystal system                                   | monoclinic                                                         |
| Space group                                      | I2/a                                                               |
| a/ $\text{\AA}$                                  | 12.9140(7)                                                         |
| b/ $\text{\AA}$                                  | 22.0318(14)                                                        |
| c/ $\text{\AA}$                                  | 17.9982(14)                                                        |
| $\alpha/^{\circ}$                                | 90.00                                                              |
| $\beta/^{\circ}$                                 | 97.635(6)                                                          |
| $\gamma/^{\circ}$                                | 90.00                                                              |
| Volume/ $\text{\AA}^3$                           | 5075.4(6)                                                          |
| Z                                                | 4                                                                  |
| $\rho_{\text{calc}}/\text{g/cm}^3$               | 1.294                                                              |
| $\mu/\text{mm}^{-1}$                             | 0.126                                                              |
| F(000)                                           | 2080.0                                                             |
| Crystal size/ $\text{mm}^3$                      | $0.1 \times 0.06 \times 0.05$                                      |
| Radiation                                        | MoK $\alpha$ ( $\lambda = 0.71073$ )                               |
| 2 $\Theta$ range for data collection/ $^{\circ}$ | 7.1 to 50.06                                                       |
| Index ranges                                     | $-14 \leq h \leq 15$ , $-25 \leq k \leq 26$ , $-21 \leq l \leq 14$ |
| Reflections collected                            | 14800                                                              |
| Independent reflections                          | 4463 [ $R_{\text{int}} = 0.0566$ , $R_{\text{sigma}} = 0.0612$ ]   |
| Data/restraints/parameters                       | 4463/0/345                                                         |
| Goodness-of-fit on $F^2$                         | 1.074                                                              |
| Final R indexes [ $I \geq 2\sigma(I)$ ]          | $R_1 = 0.0808$ , $wR_2 = 0.2294$                                   |
| Final R indexes [all data]                       | $R_1 = 0.1123$ , $wR_2 = 0.2549$                                   |

Largest diff. peak/hole / e  $\text{\AA}^{-3}$  0.66/-0.63

### **Perovskite Solar Cell Fabrication**

The perovskite and hole-transport material solutions were prepared inside an Argon glovebox. Conducting  $\text{SnO}_2:\text{F}$  glass substrates (Pilkington, TEC15) were cut (25 mm x 15 mm) and patterned by chemical etching using zinc powder and hydrochloric acid. The substrates were washed by sonication in deionized water, acetone and ethanol for 15 minutes each. A thin and dense layer of  $\text{TiO}_2$  (bl- $\text{TiO}_2$ ) was applied on the glass using spray-pyrolysis at  $500^\circ\text{C}$  from a solution of 0.2 M titanium (IV) tetraisopropoxide (Aldrich) and 2 M acetylacetonate (Aldrich) in isopropanol (Aldrich). The 15% Tin Oxide colloid precursor was diluted to 2.67% by deionized water. And the solution was spun onto the glass/compact  $\text{TiO}_2$  substrate surface at 3000 r.p.m for 30 s, and then baked on a hotplate in ambient atmosphere at  $120^\circ\text{C}$  for 20 min. To yield a  $(\text{FAPbI}_3)_{0.85}(\text{MAPbBr}_3)_{0.15}$  perovskite solution we mixed  $\text{PbI}_2$  (Xi'an Polymer Light Technology Corp.), FAI (Xi'an Polymer Light Technology Corp.),  $\text{PbBr}_2$  (Xi'an Polymer Light Technology Corp.), MABr (Xi'an Polymer Light Technology Corp.) in molar concentrations of 1.1, 1, 0.2, 0.2, respectively, in 4:1 DMF:DMSO (anhydrous, Aldrich). The solutions were heated to dissolve the inorganic salts but otherwise kept at room temperature at all times. 75  $\mu\text{l}$  of the perovskite solution spread onto the  $\text{SnO}_2$ . The substrate was the spin-coated at 2000 rpm for 10 seconds and 6000 rpm for 30 seconds with a ramp speed of 2000 rpm/s. During the second spin-coating step an anti-solvent was injected onto the film after 15 seconds using 200  $\mu\text{l}$  of chlorobenzene (anhydrous, Aldrich). The perovskite films were then annealed at  $100^\circ\text{C}$  for 30 minutes on a hotplate. Subsequently, the HTM layer was then spin coated on top of the perovskite film. The PDO1 and PDO2-based HTL was deposited by spin coating at 4000 rpm for 30 s with a chlorobenzene containing 40 mg PDO1 or PDO2, 30 mM LiTFSI and 200 mM TBP. Finally, a layer of 100 nm Au was deposited sequentially under high vacuum ( $<4 \times 10^{-4}$  Pa) by thermal evaporation through a shadow mask to

form an active area of  $\sim 20 \text{ mm}^2$ .

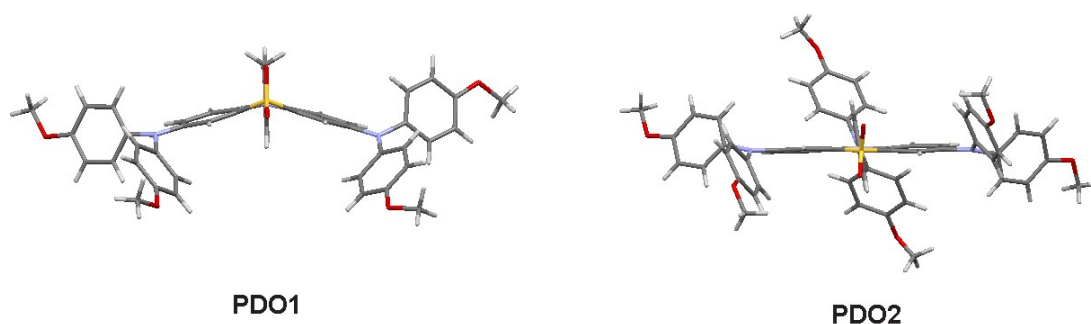

Figure S7 Top-view of PDO1 and PDO2 crystal structures

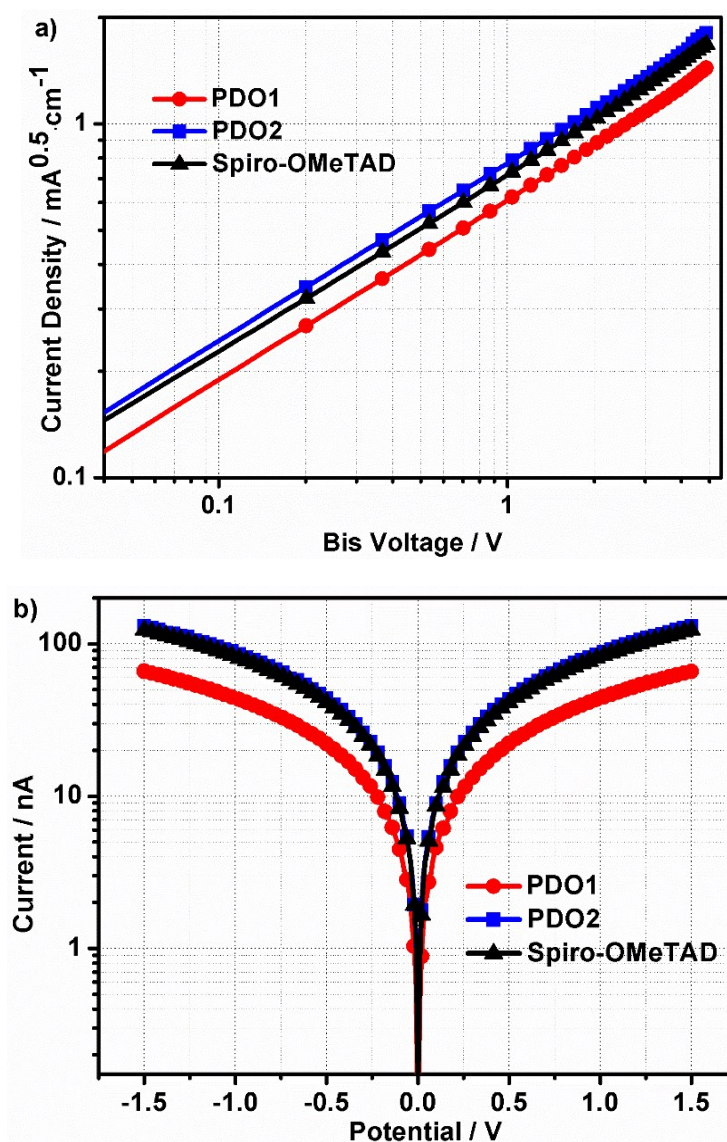

Figure S8 a) hole mobility test result of PDO1, PDO2 and Spiro-OMeTAD, b)

Conductivity of PDO1, PDO2 and Spiro-OMeTAD

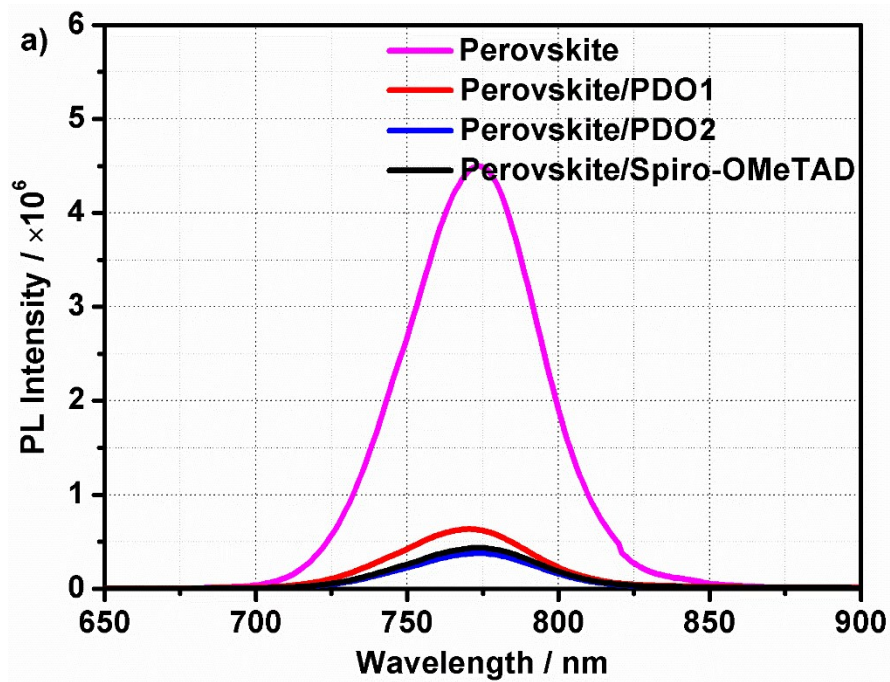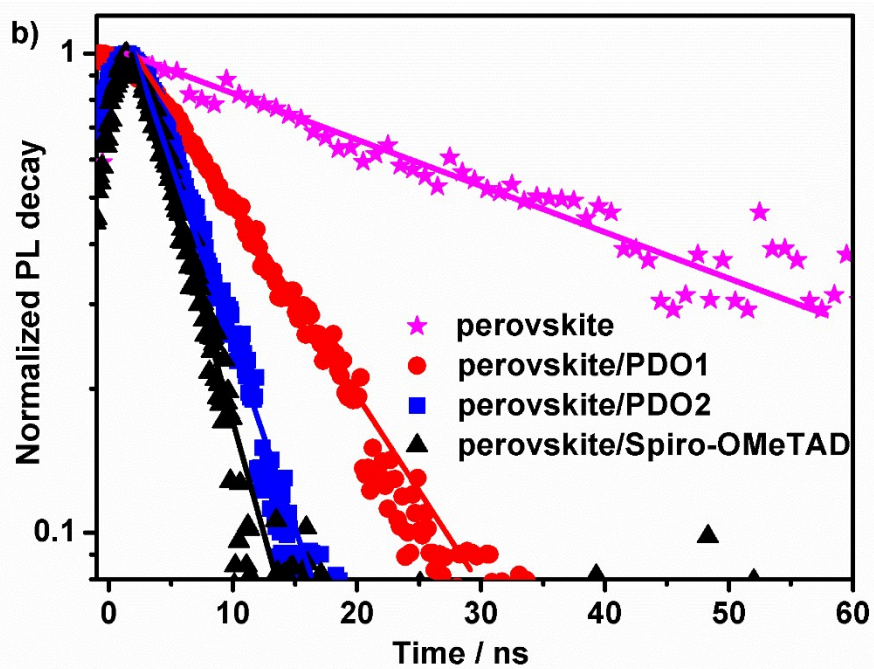

Figure S9 Steady-state PL decay of perovskite, perovskite/PDO1 and perovskite/PDO2 systems

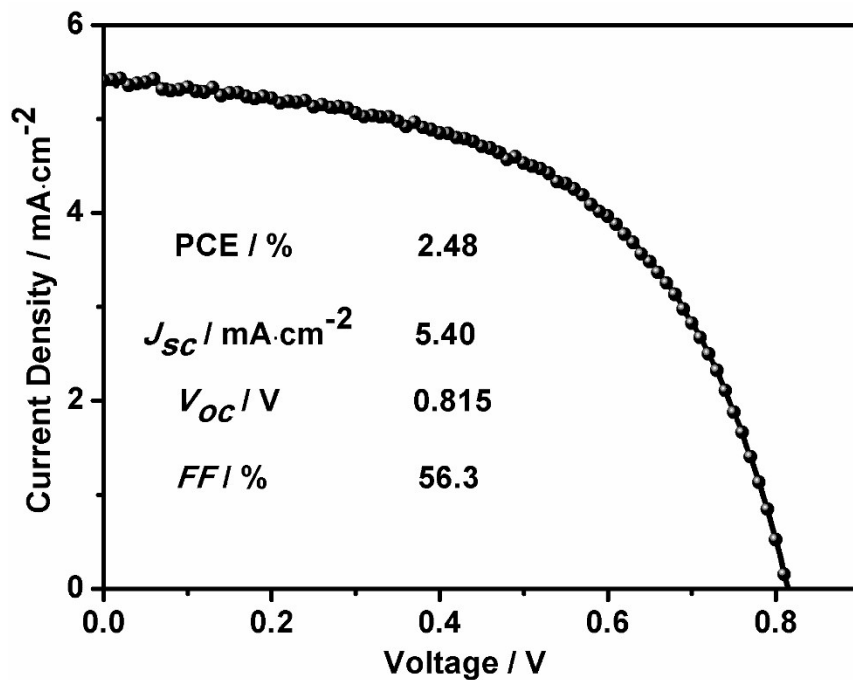

Figure S10  $J$ - $V$  characteristic curves of the PSCs containing PTZ1 as HTM

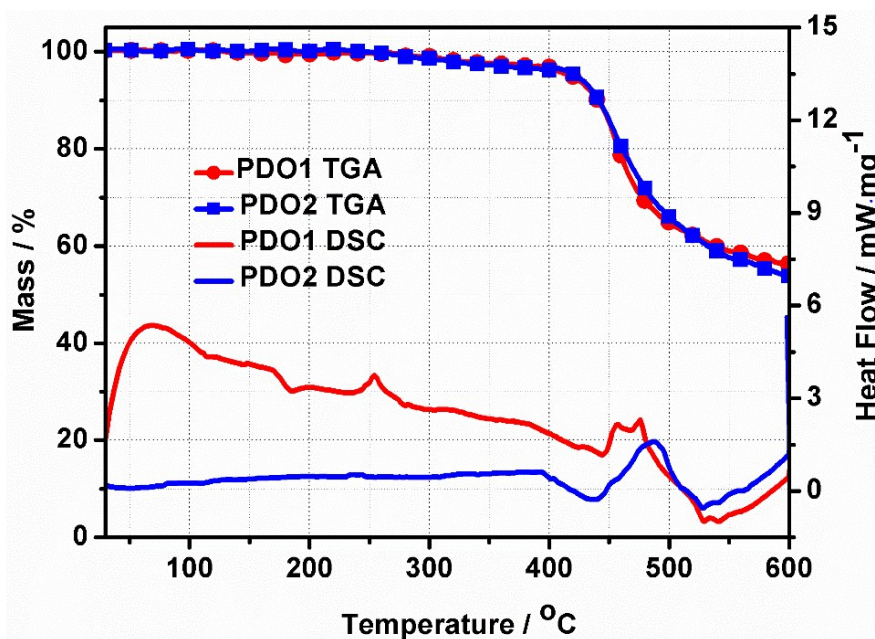

Figure S11 Thermogravimetric analysis and DSC heating traces of PDO1 and PDO2 measured with a heating rate of 10 °C min<sup>-1</sup> under nitrogen atmosphere.
